# Supplementary material
Source: HighWire-hosted journal article supplement (https://bjo.bmj.com/content/107/5/725)
Supplement: inline-supplementary-material-2 [file inline-supplementary-material-2.pdf]

**eTables**

**eTable 1:** Details of cases where nasal transposition of the split lateral rectus muscle (NTSLR) plus an ipsilateral augmentative surgery affecting horizontal eye alignment was performed. A minus number in the deviations columns indicates esotropia.

Abbreviations: PD – prism diopters; Y – yes; N – no; MR – medial rectus muscle; mm – millimeters; SO – superior oblique muscle.

| <b>Case</b> | <b>Etiology</b>    | <b>Other surgery affecting horizontal eye alignment</b> | <b>Pre-operative horizontal deviation (PD)</b> | <b>Post-operative horizontal deviation (PD)</b> | <b>Success (Y/N)</b> | <b>Complication</b>                               |
|-------------|--------------------|---------------------------------------------------------|------------------------------------------------|-------------------------------------------------|----------------------|---------------------------------------------------|
| 1           | Neoplastic         | Fascia lata lengthening                                 | 45                                             | 0                                               | Y                    | Superior half of LR was pulled in two             |
| 2           | Traumatic          | Fascia lata lengthening                                 | 45                                             | 45                                              | N                    | Inferior half of LR was pulled in two             |
| 3           | Other              | MR tuck 7.0 mm                                          | 214                                            | 14                                              | Y                    | None                                              |
| 4           | Ischemic           | MR tuck 10.0 mm                                         | 115                                            | -14                                             | Y                    | None                                              |
| 5           | Post neurosurgical | MR tuck 10.0 mm                                         | 90                                             | 7                                               | Y                    | Serous retinal detachment                         |
| 6           | Neoplastic         | MR tuck 12.0 mm                                         | 119                                            | 0                                               | Y                    | Globe compression noted with muscle transposition |
| 7           | Other              | MR resection 3.0 mm                                     | 90                                             | 16                                              | N                    | Difficulty with LR muscle splitting               |
| 8           | Neoplastic         | MR resection adjustable; SO transposition               | 80                                             | -2                                              | Y                    | None                                              |
| 9           | Traumatic          | MR resection adjustable; SO transposition               | 50                                             | 4                                               | Y                    | None                                              |
| 10          | Post neurosurgical | SO transposition                                        | 90                                             | 6                                               | Y                    | None                                              |

**eTable2:** Success of nasal transposition of the split lateral rectus muscle surgery alone when used for correction of exotropia associated with 3<sup>rd</sup>-nerve palsy.

| <i>Etiology of 3<sup>rd</sup>-nerve palsy</i> | <i>N (% total)</i> | <i>Success (%)</i> |
|-----------------------------------------------|--------------------|--------------------|
| <i>Congenital</i>                             | 31 (31.6)          | 23 (73.2)          |
| <i>Neoplastic</i>                             | 16 (16.3)          | 10 (62.5)          |
| <i>Traumatic</i>                              | 15 (15.3)          | 7 (46.7)           |
| <i>Post neurosurgical</i>                     | 8 (8.2)            | 8 (100.0)          |
| <i>Ischemic</i>                               | 7 (7.1)            | 4 (57.1)           |
| <i>Aneurysmal</i>                             | 3 (3.1)            | 1 (33.3)           |
| <i>Other/unclassified</i>                     | 18 (18.4)          | 15 (83.3)          |
| <b>Total</b>                                  | 98 (100)           | 68 (69.4)          |
